# Supplementary material for: Changes in Bone Marrow Fatty Acids Early after Ovariectomy-Induced Osteoporosis in Rats and Potential Functions
Source: MDPI journal article supplement (doi:10.3390/metabo13010036), 2022-12-26
Supplement: s1 [file s1]

**Table S1.** VIP values of fatty acids on the 3rd day

| <b>Fatty acids</b>   | <b>VIP values</b> |
|----------------------|-------------------|
| Palmitoleate         | 2.691585693       |
| Myristate            | 2.075778242       |
| Arachidonate         | 1.533928522       |
| Docosahexaenoate     | 0.84502846        |
| Myristoleate         | 0.820132861       |
| Heptadecanoate       | 0.776451813       |
| Alpha linolenate     | 0.752873546       |
| Eicosadienoate       | 0.745937418       |
| Nervonoate           | 0.502646536       |
| Stearate             | 0.469915765       |
| Homogamma Linolenate | 0.465295352       |
| Laurate              | 0.380375104       |
| Gamma linolenate     | 0.247806882       |
| Palmitate            | 0.193000772       |
| Arachidate           | 0.162783227       |
| Erucate              | 0.139940784       |
| Eicosenoate          | 0.036941738       |
| Pentadecanoate       | 0.001188429       |

**Table S2.** VIP values of fatty acids on the 14th day

| <b>Fatty acids</b>   | <b>VIP values</b> |
|----------------------|-------------------|
| Palmitoleate         | 1.730463048       |
| Myristate            | 1.663763778       |
| Alpha linolenate     | 1.648455561       |
| Gamma linolenate     | 1.463276233       |
| Pentadecanoate       | 1.199061055       |
| Stearate             | 1.16163541        |
| Eicosenoate          | 1.049586923       |
| Eicosadienoate       | 0.993133164       |
| Laurate              | 0.956790419       |
| Heptadecanoate       | 0.720661481       |
| Arachidonate         | 0.592671264       |
| Homogamma Linolenate | 0.445040643       |
| Erucate              | 0.440255224       |
| Myristoleate         | 0.327426894       |
| Palmitate            | 0.259042422       |
| Nervonoate           | 0.239338966       |
| Arachidate           | 0.226210643       |
| Docosahexaenoate     | 0.207370564       |

**Table S3.** Chemical formula of fatty acids

| Chemical formula | Fatty acid           |
|------------------|----------------------|
| C12:0            | Laurate              |
| C14:0            | Myristate            |
| C14:1            | Myristoleate         |
| C15:0            | Pentadecanoate       |
| C16:0            | Palmitate            |
| C16:1            | Palmitoleate         |
| C17:0            | Heptadecanoate       |
| C18:0            | Stearate             |
| C20:0            | Arachidate           |
| C18:3N6          | Gamma Linolenate     |
| C20:1            | Eicosenoate          |
| C18:3N3          | Alpha Linolenate     |
| C20:2            | 11-14 Eicosadienoate |
| C20:3N6          | Homogamma Linolenate |
| C22:1N9          | Erucate              |
| C20:4N6          | Arachidonate         |
| C24:1            | Nervonoate           |
| C22:6N3          | Docosahexaenoate     |
